# Supplementary material
Source: Springer Nature journal article supplement (https://www.springermedizin.de/resource/supplementary/12879_2012_2032_MOESM1_ESM.pdf/9443586)
Supplement: MOESM1 [file 9443586]

**102 patients assessed for eligibility:**  
with a CVC in place, stayed > 48 hours in ICU

**56 excluded patients**

- 15 with infection at admission
- 41 with infection other than CRBSI during ICU stay

**46 patients with suspected CRBSI**

**Not proven CRBSI : 20 patients**

**Proven CRBSI : 26 patients**

**Infection control during therapy**

**Controlled infection:  
16 patients**

**Not controlled infection:  
10 patients**
